# Supplementary material for: Development of edible food coating using cassava starch/agar blends infused with clove oil for the preservation of mangoes
Source: Royal Society of Chemistry journal article supplement (doi:10.1039/d5fb00409h), 2025-10-27
Supplement: d5fb00409h1.pdf [file d5fb00409h1.pdf]

**Supplementary Material 1 (S1)**

**Sensory Evaluation Form**

| <b>Panelist Hedonic Rating</b> | <b>Rating Scale</b> | <b>Appearance</b> | <b>Flavor</b> | <b>Texture</b> | <b>Aroma</b> | <b>Overall</b> |
|--------------------------------|---------------------|-------------------|---------------|----------------|--------------|----------------|
| <b>Dislike Extremely</b>       | <b>1</b>            |                   |               |                |              |                |
| <b>Dislike Moderately</b>      | <b>2</b>            |                   |               |                |              |                |
| <b>Neither like or Dislike</b> | <b>3</b>            |                   |               |                |              |                |
| <b>Like Moderately</b>         | <b>4</b>            |                   |               |                |              |                |
| <b>Like Extremely</b>          | <b>5</b>            |                   |               |                |              |                |
